# Supplementary material
Source: PubMed Central journal article supplement (PMC7450823)
Supplement: NIHMS1610536-supplement-Supplement1.pdf [file NIHMS1610536-supplement-Supplement1.pdf]

## **Analytical and Bioanalytical Chemistry**

### **Electronic Supplementary Material**

#### **Examining NTA performance and potential using fortified and reference house dust as part of EPA's Non-Targeted Analysis Collaborative Trial (ENTACT)**

Seth Newton, Jon R. Sobus, Elin M. Ulrich, Randolph R. Singh, Alex Chao, James McCord, Sarah Laughlin-Toth, Mark Strynar

Additional file available under “Supplementary material”.

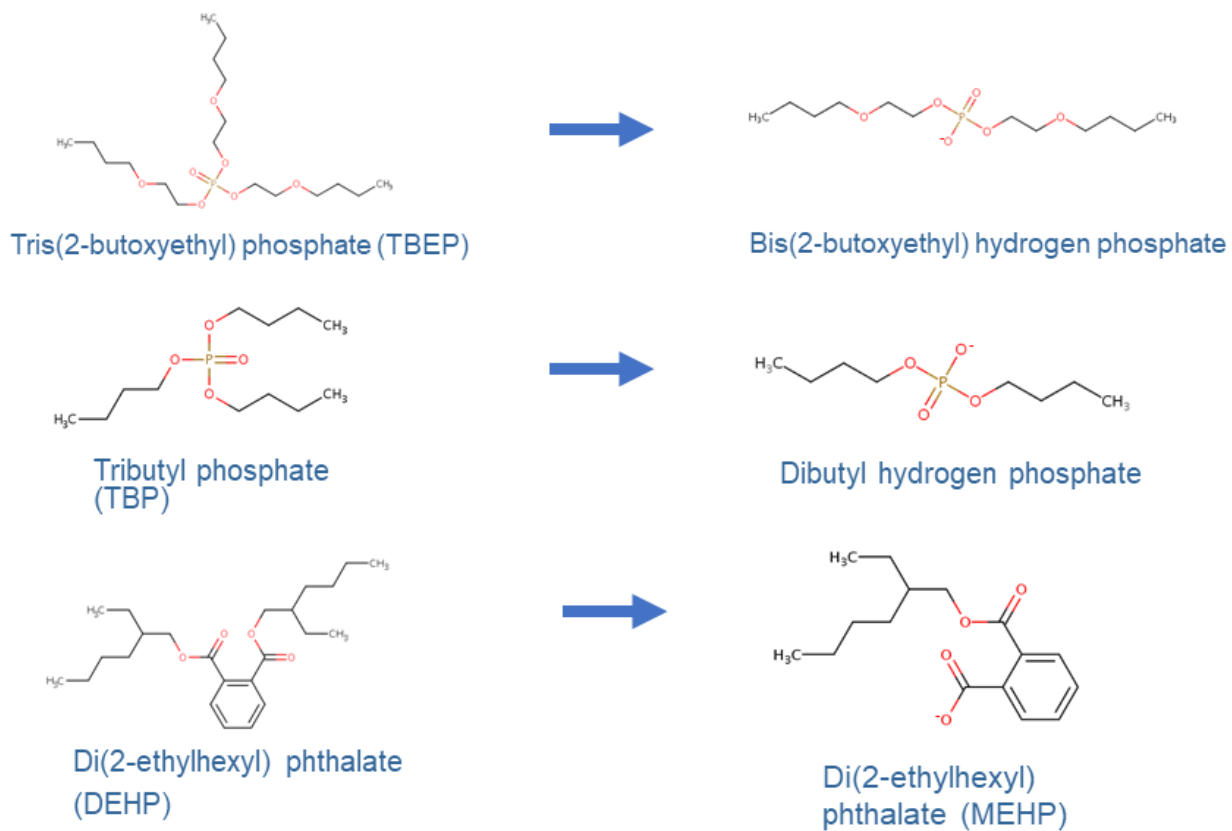

**Fig. S1** In-source fragments observed in this study

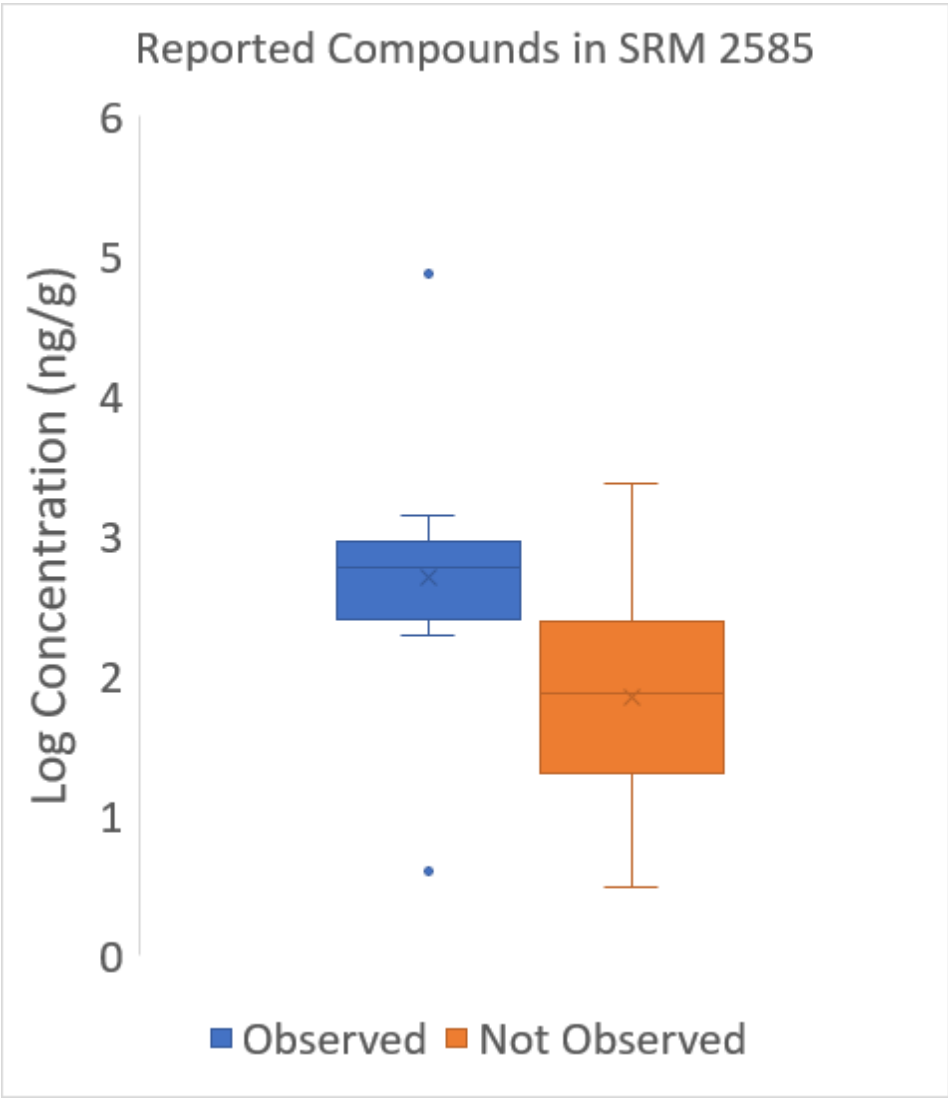

**Fig. S2** Box and whisker plots of the reported range of concentrations of LC-ESI amenable compounds observed and unobserved in this study

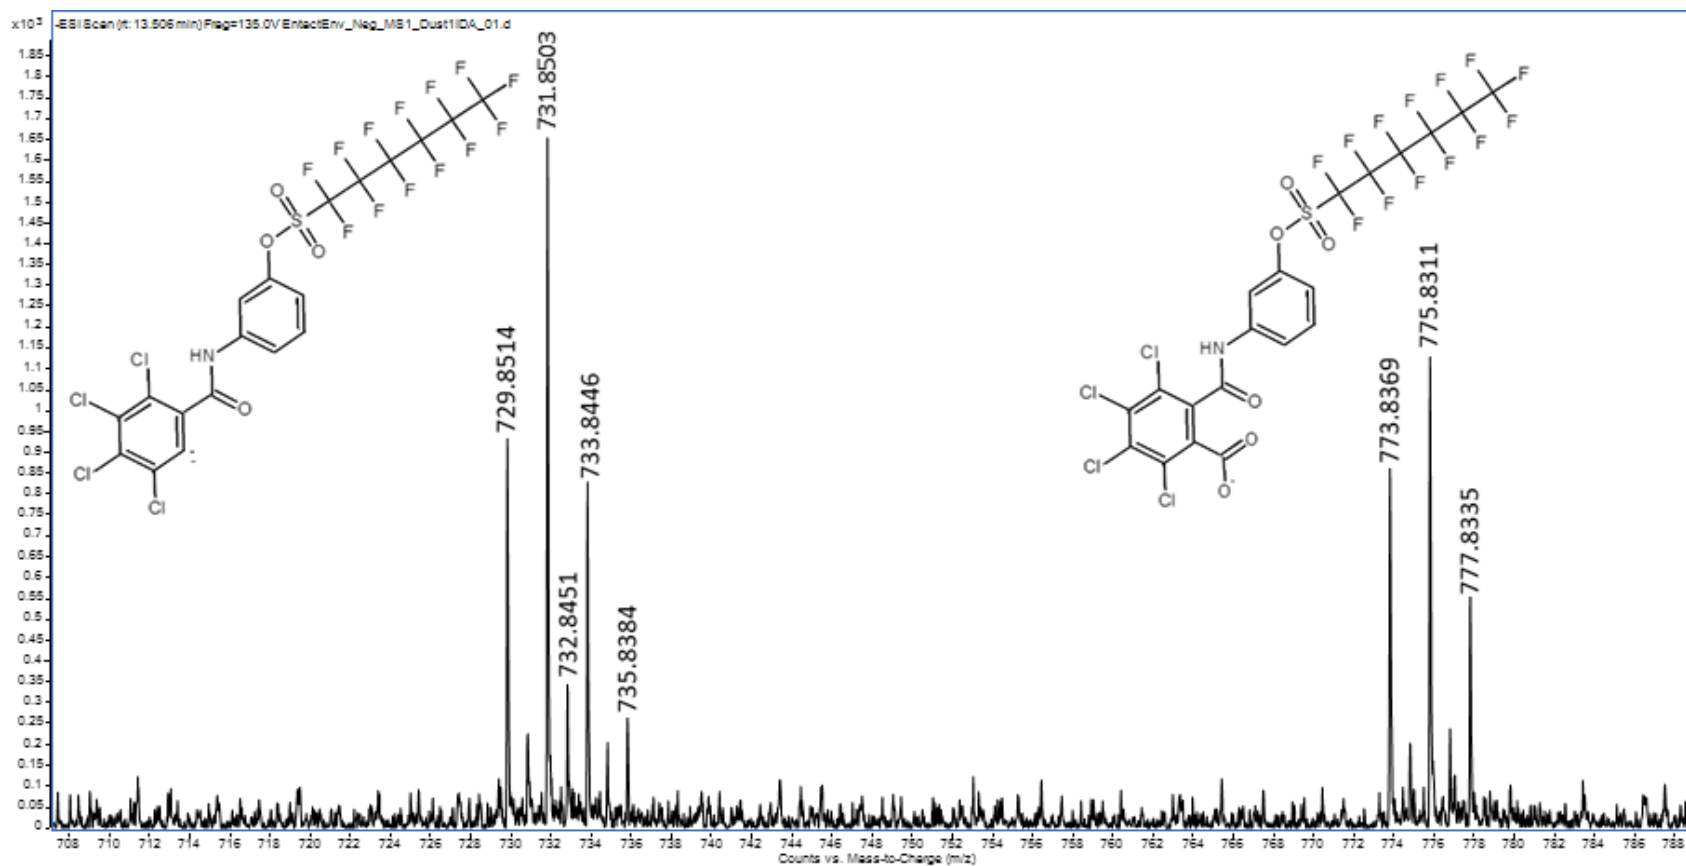

Fig. S3 MS1 spectrum of TCBA-BA-PFHxS and its decarboxylated form

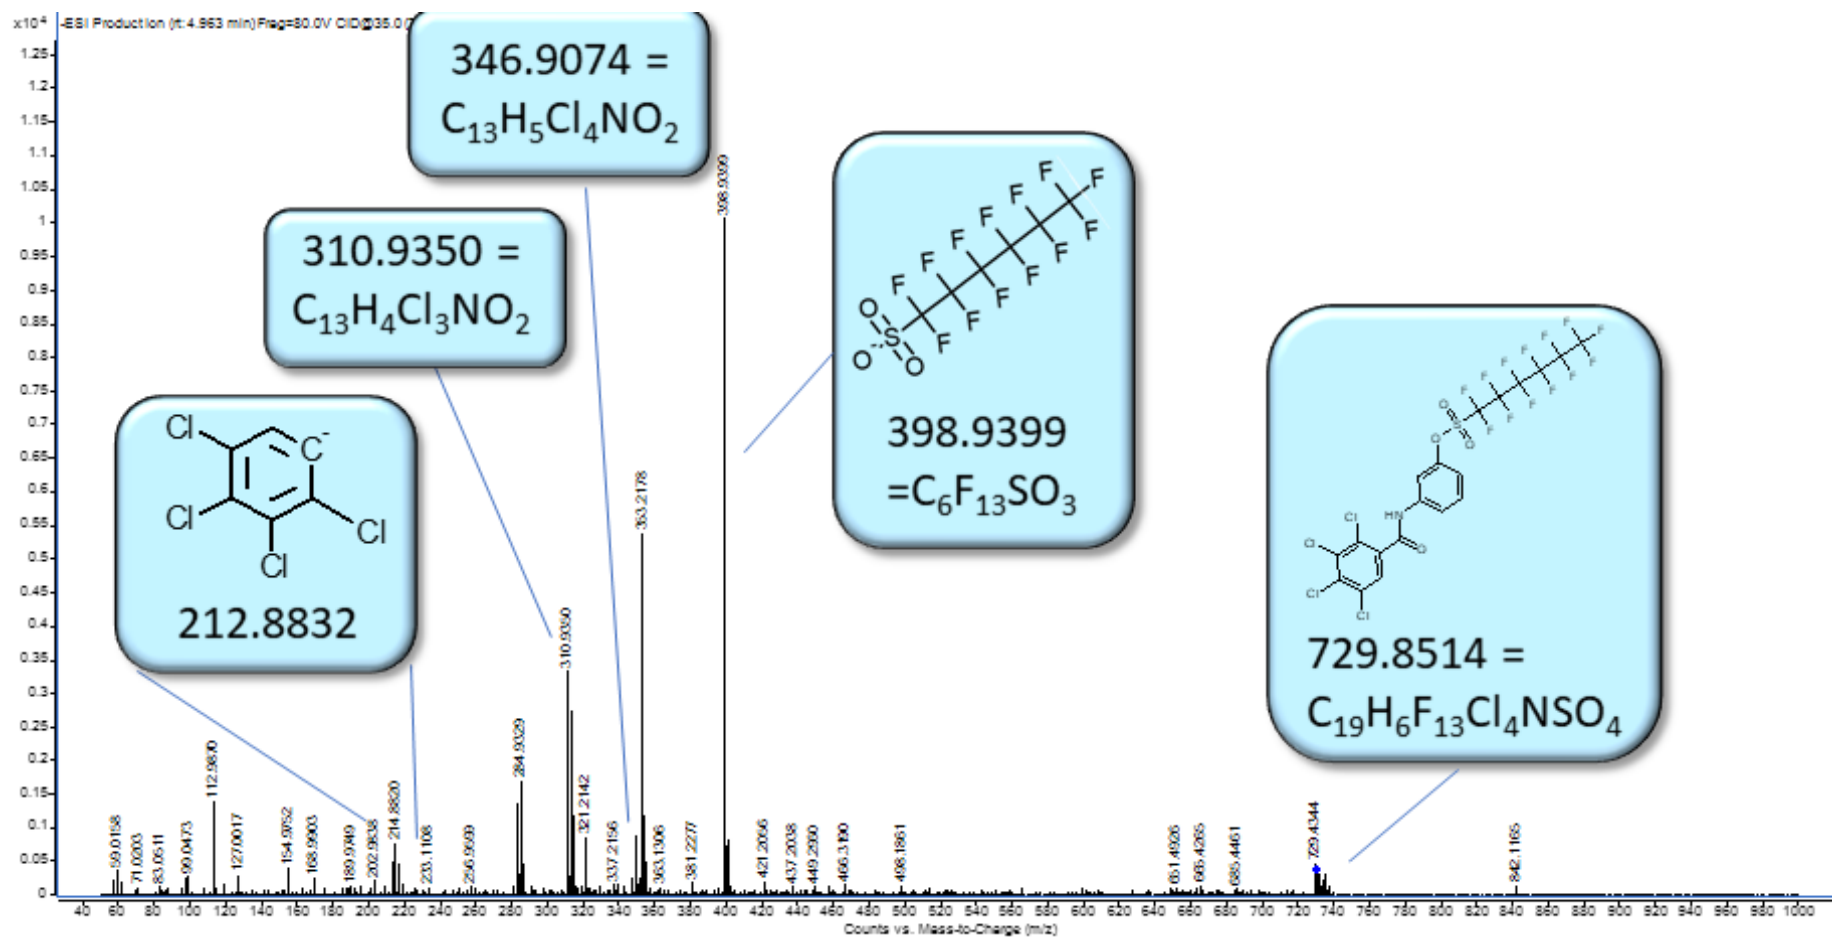

Fig. S4 Annotated MS/MS spectrum of decarboxylated TCBA-BA-PFHxS

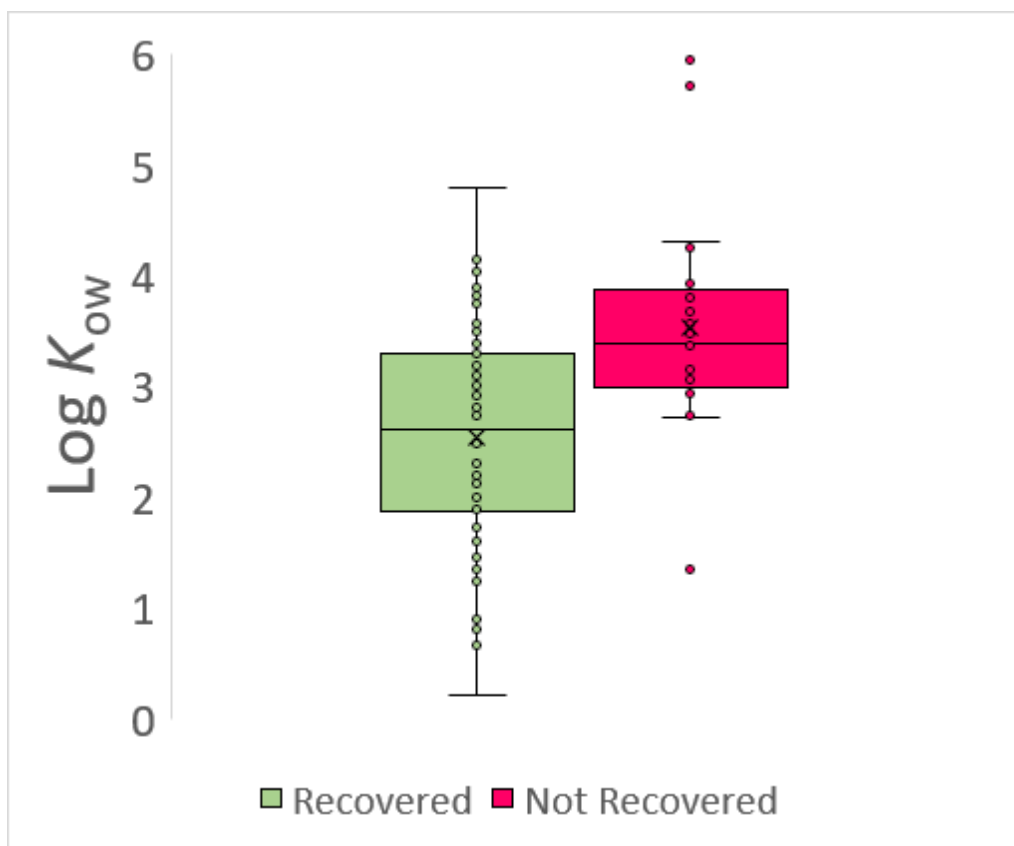

**Fig. S5** Range of Log  $K_{ow}$  values for compounds recovered from the extraction and clean-up procedure vs those not recovered
